# Supplementary material for: MiR-1287-5p inhibits triple negative breast cancer growth by interaction with phosphoinositide 3-kinase CB, thereby sensitizing cells for PI3Kinase inhibitors
Source: Springer Nature journal article supplement (doi:10.1186/s13058-019-1104-5), 2019-02-01

**A** **miR-1287-5p expression**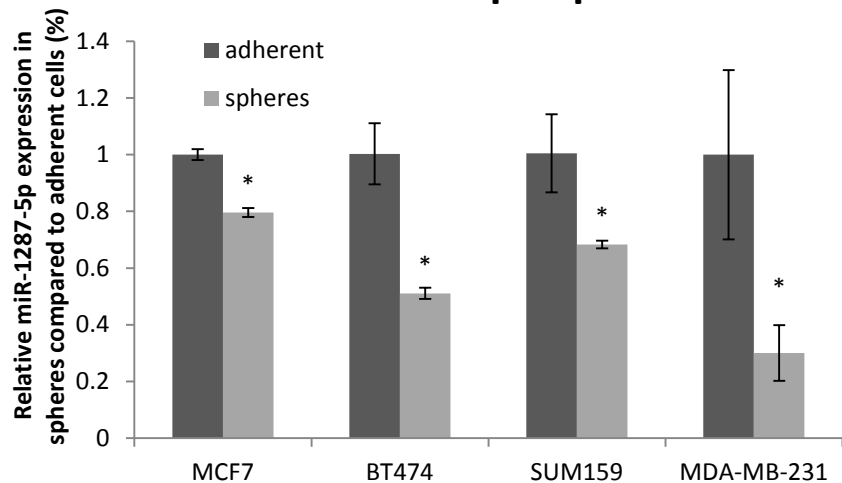**B** **P<0.0001**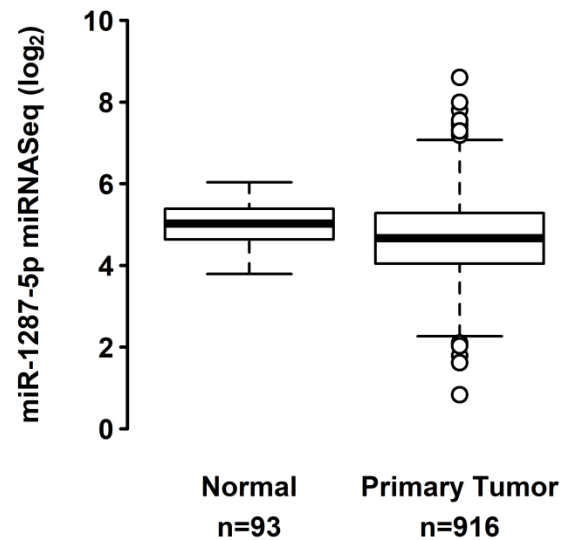**C**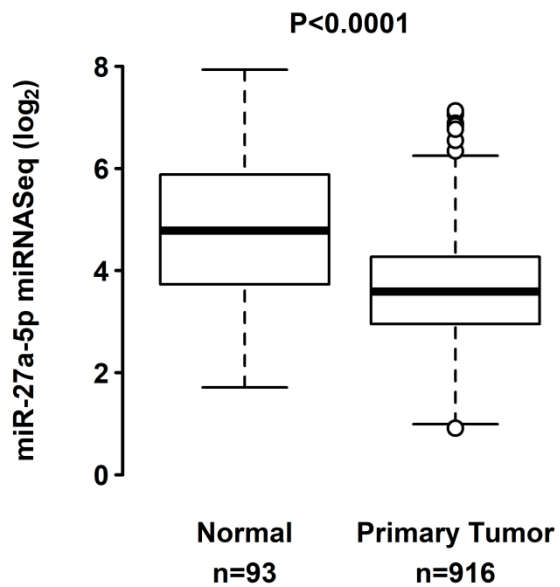**D**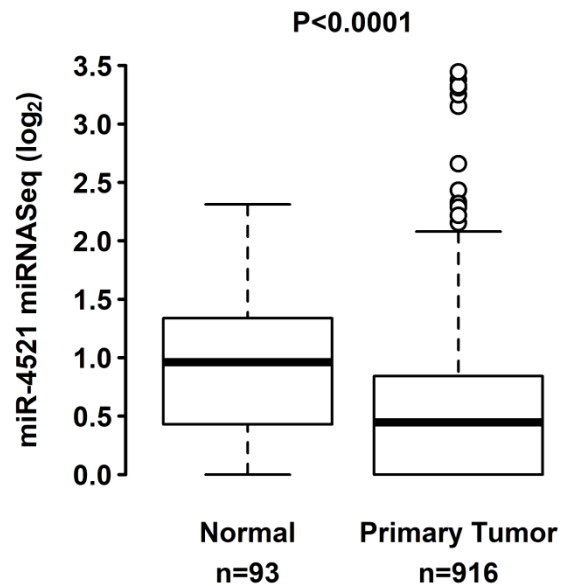**E**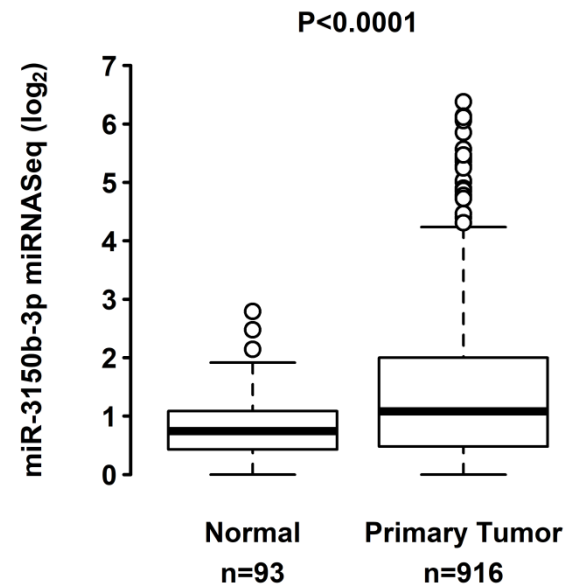

**A****Relative miR-1287-5p expression in BC cell lines**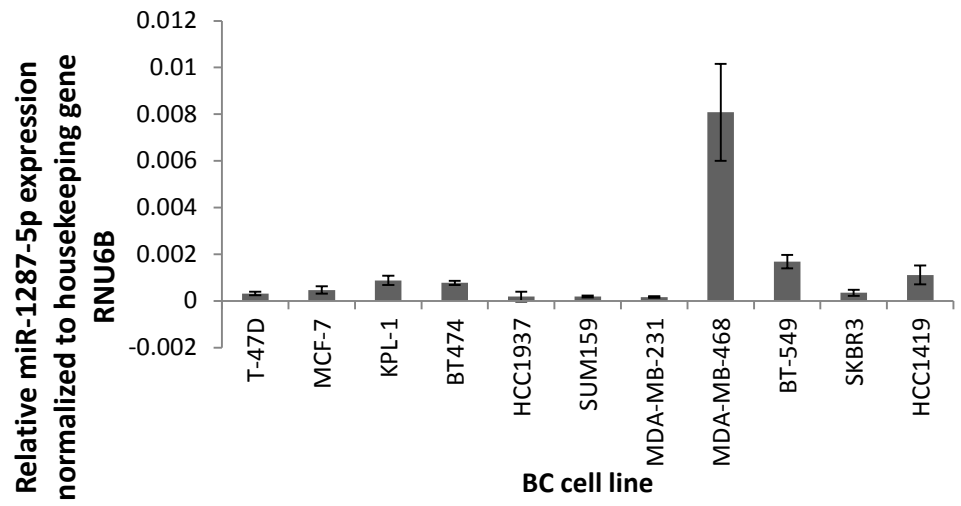

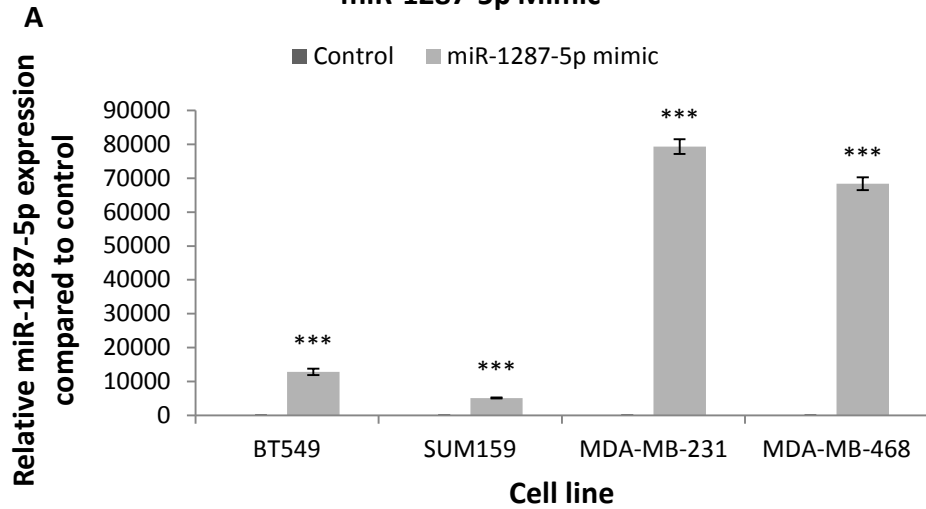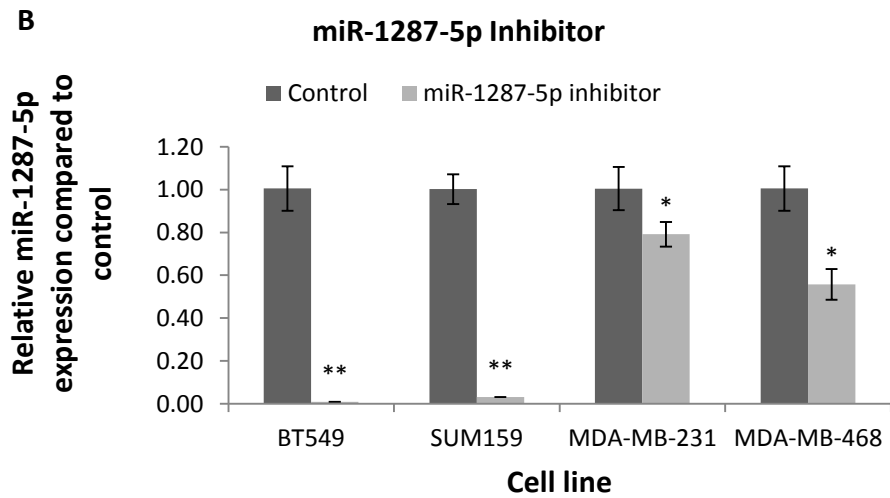

**A****SUM159**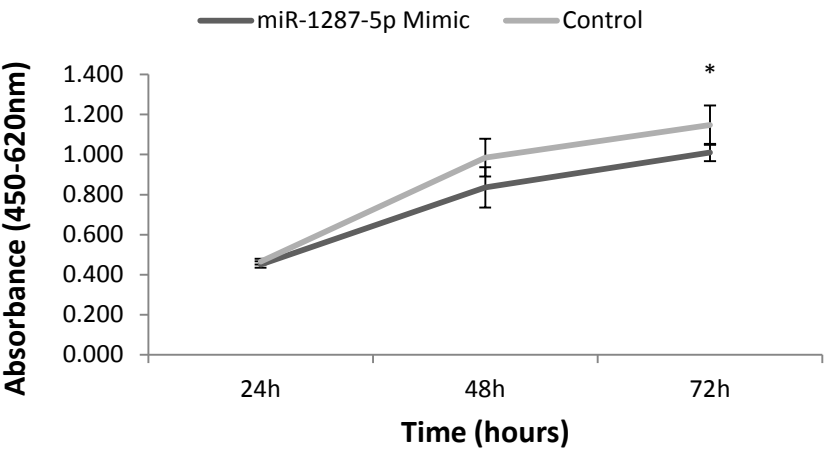**C****MDA-MB-468**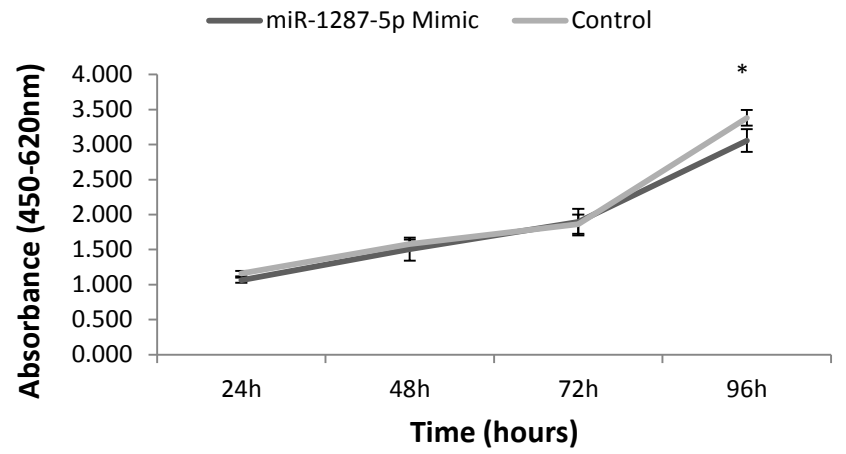**B****BT549**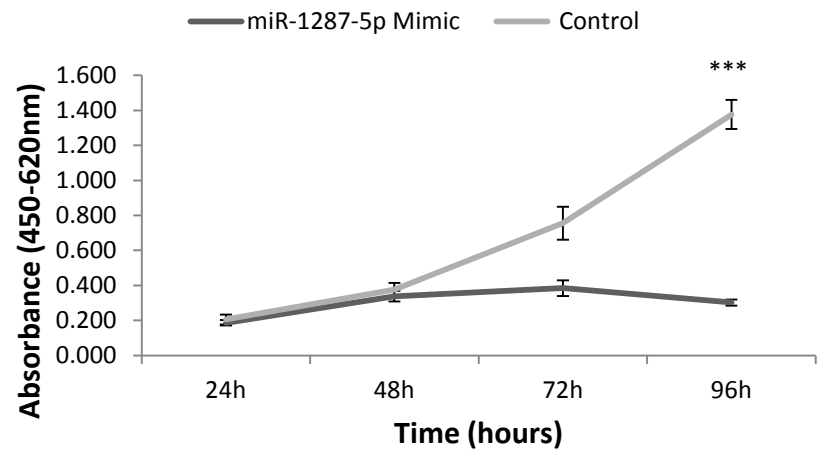**D****MDA-MB-231**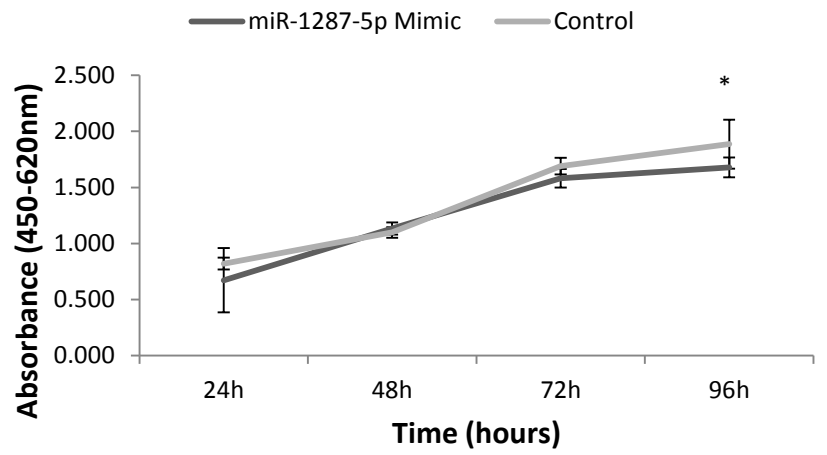

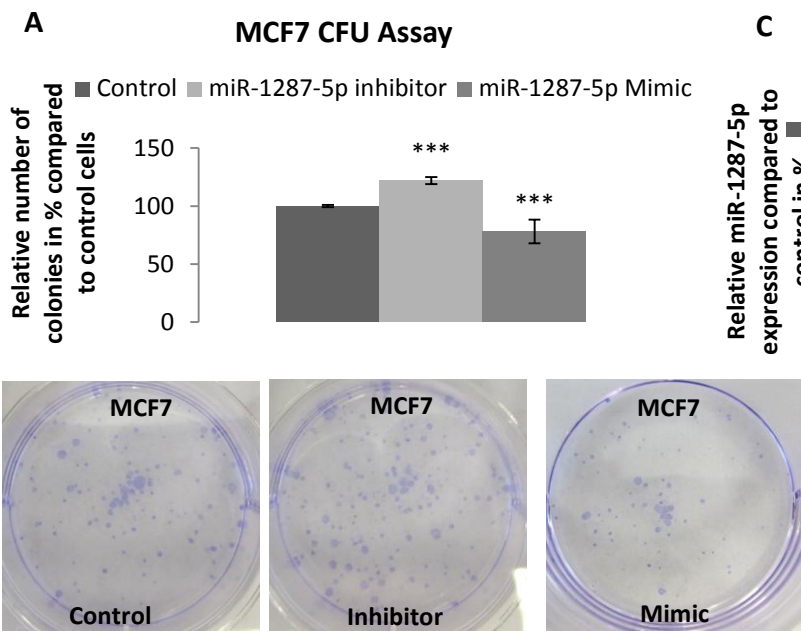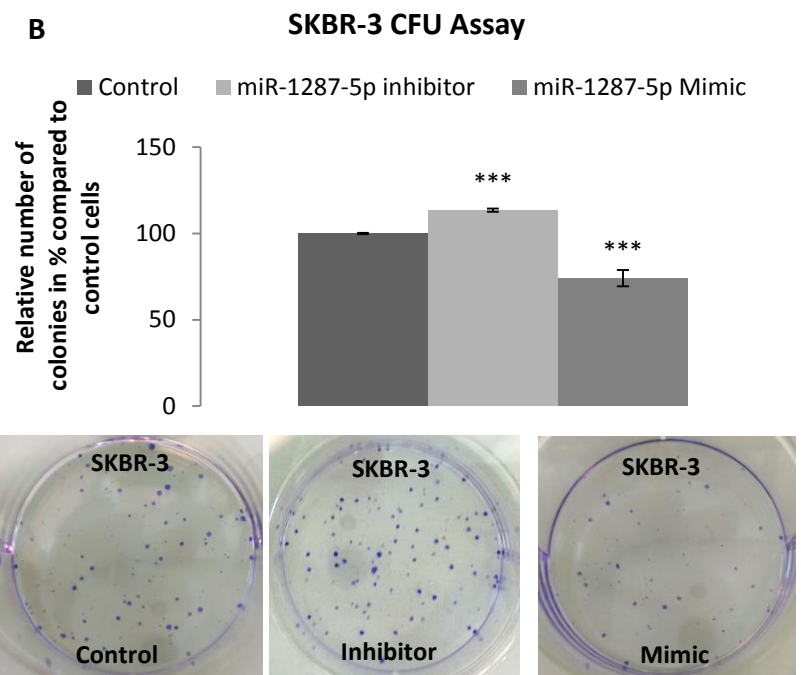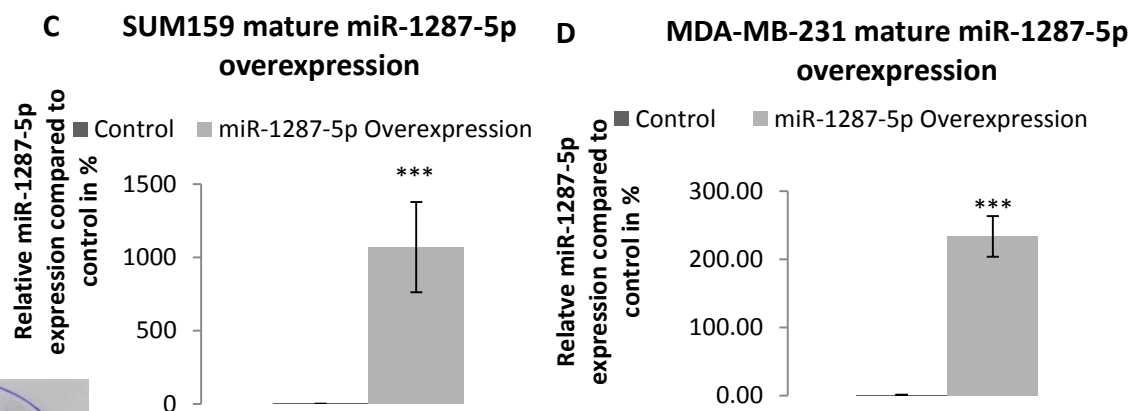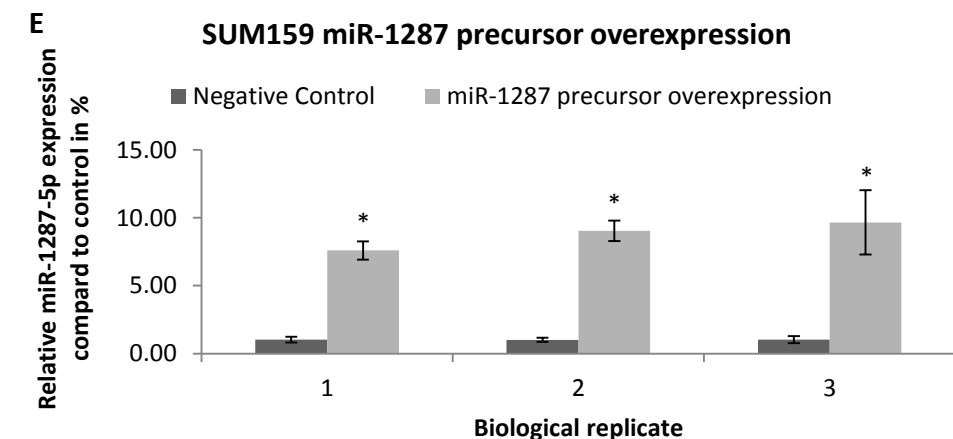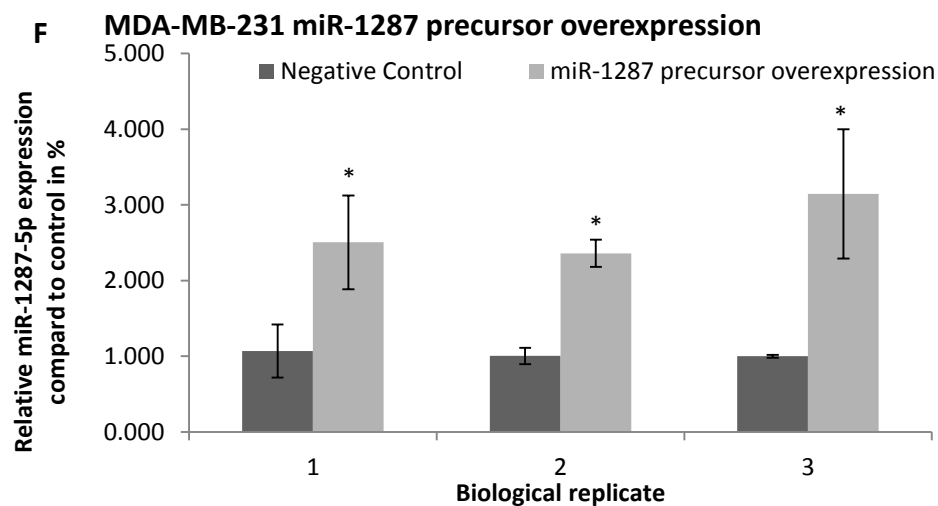

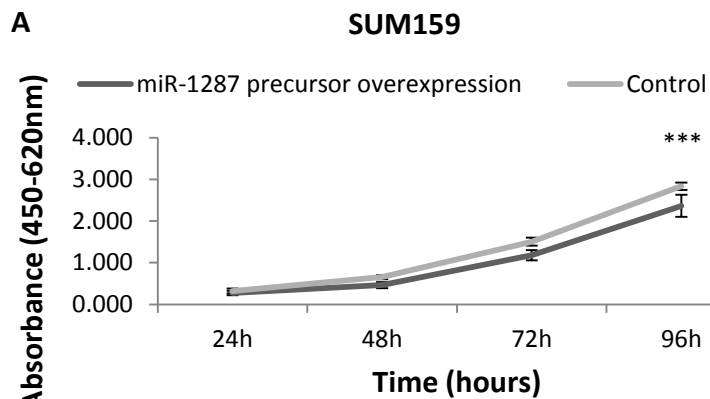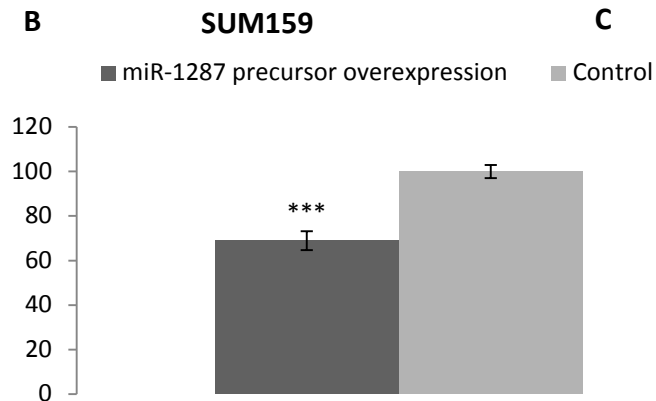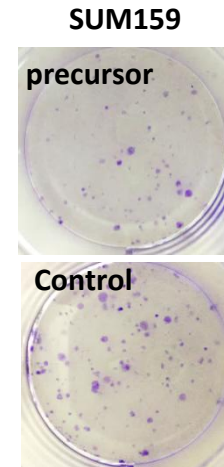

**Xenografts of miR-1287 precursor overexpression SUM159**

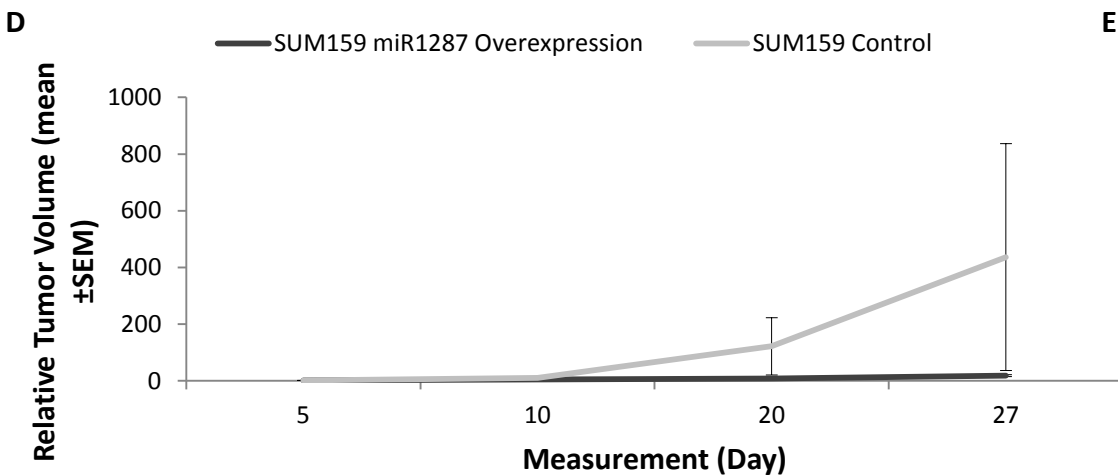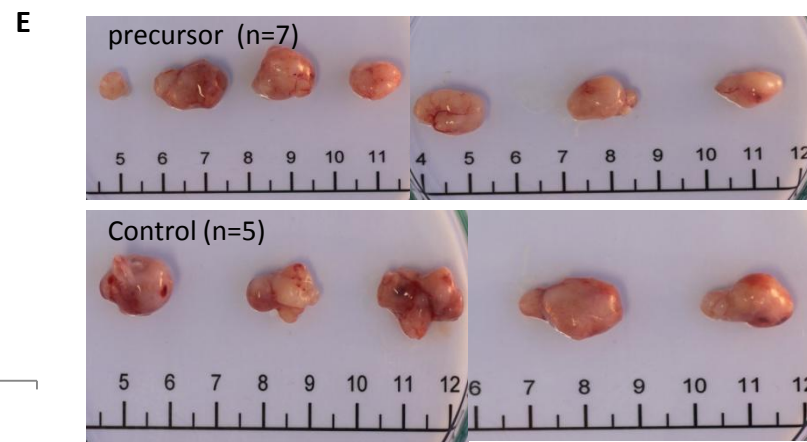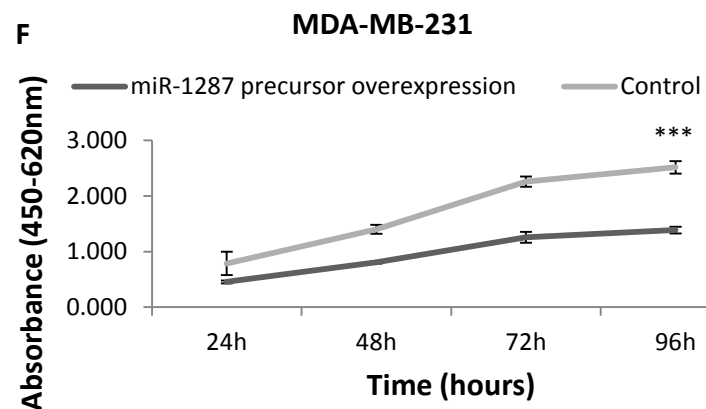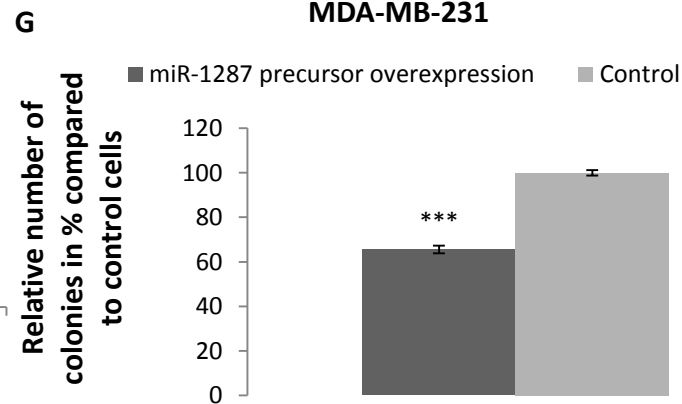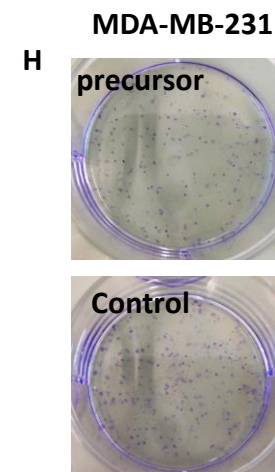

**A****Caspase 3/7 assay: transient transfections**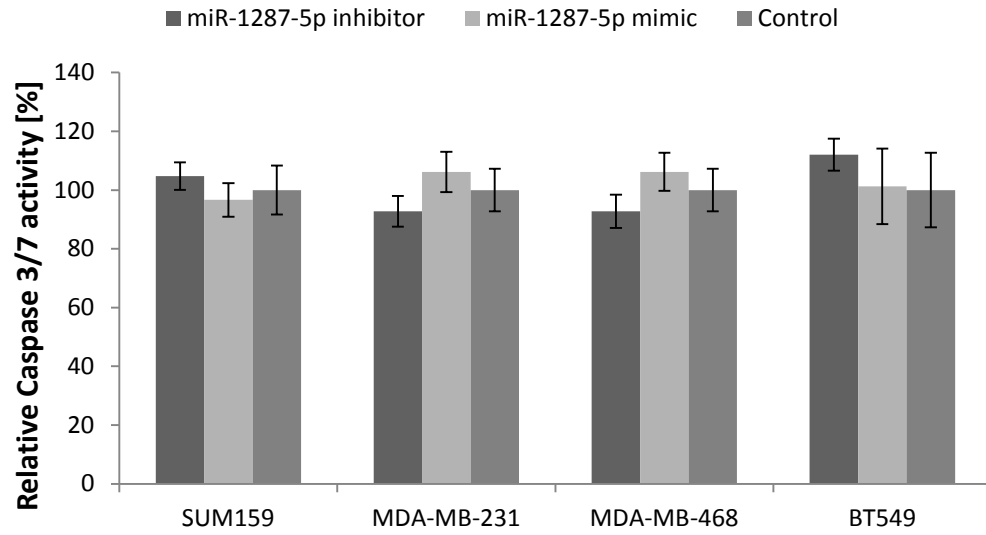**B****Caspase 3/7 assay: lentiviral miR-1287 precursor overexpressing cell lines**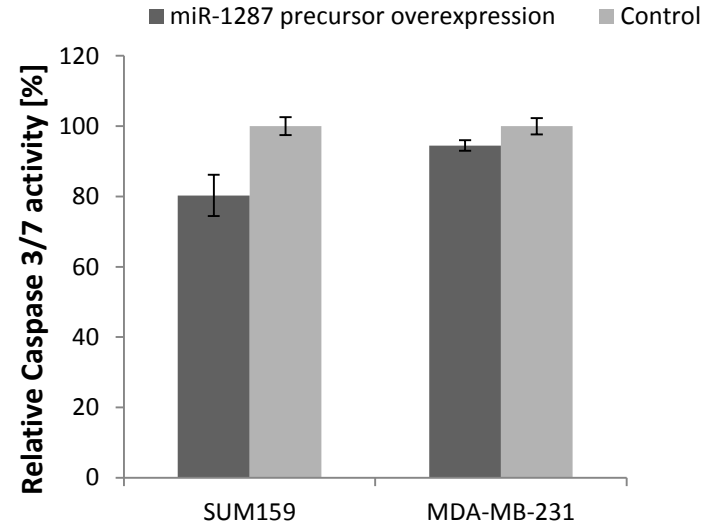**C****Caspase 3/7 assay: lentiviral miR-1287-5p overexpressing cell lines**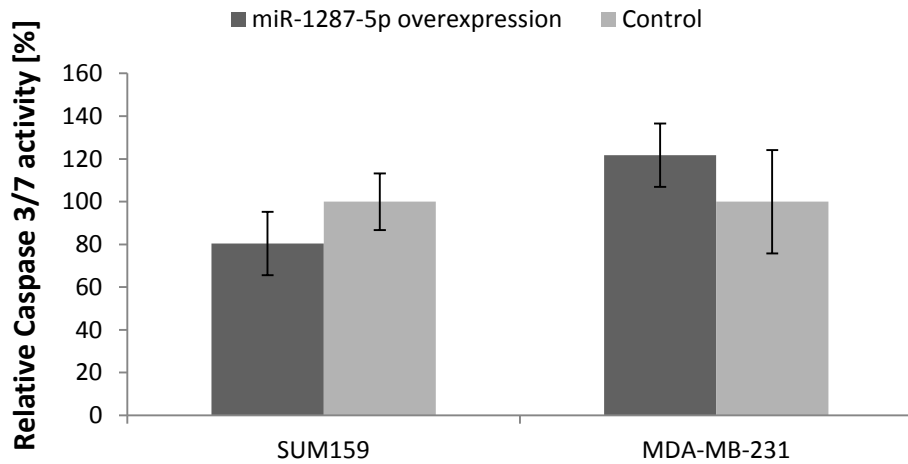

## Stable transfection:

**A** SUM159

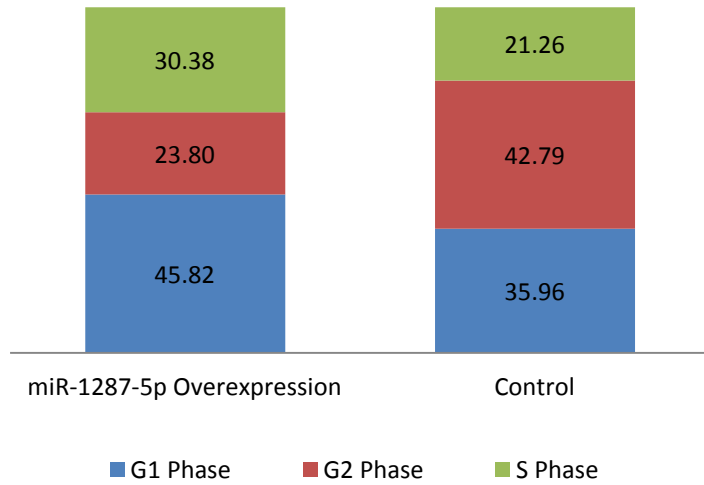

**B** MDA-MB-231

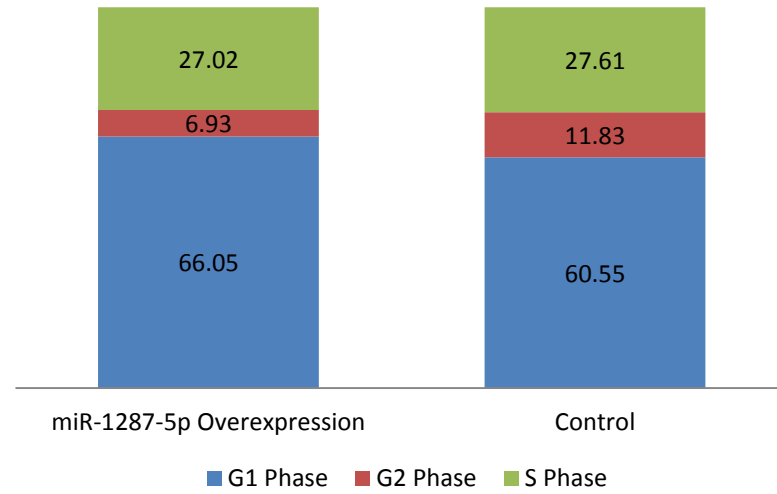

## Transient transfection:

**C** SUM159

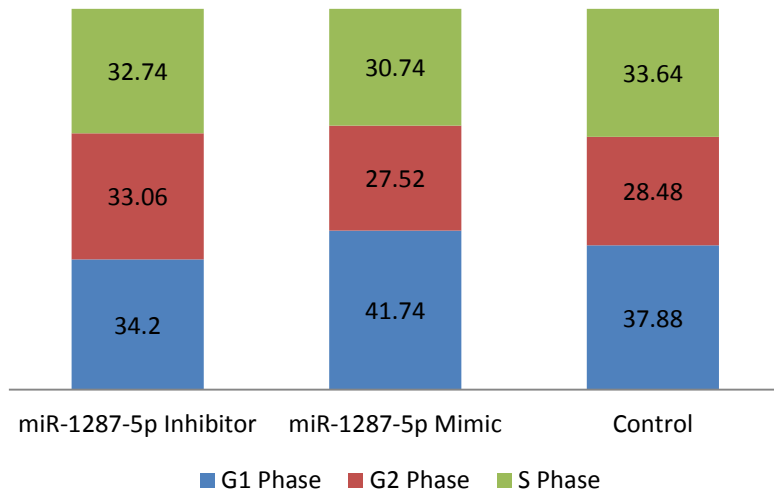

**D** BT549

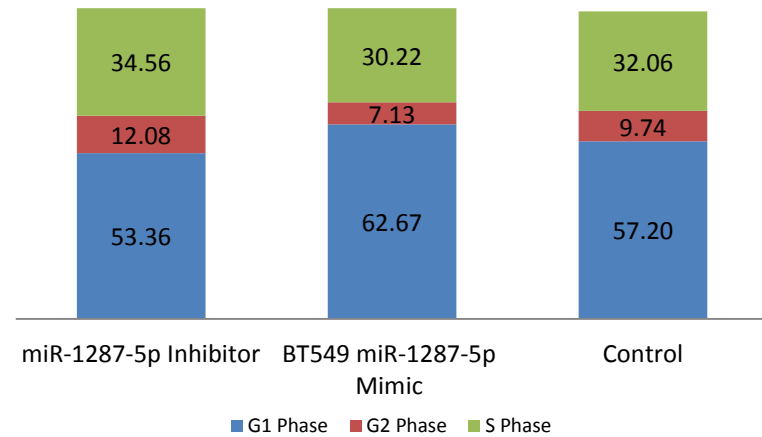



**SUM159**

**A** ■ Control ■ miR-1287-5p inhibitor ■ miR-1287-5p mimic

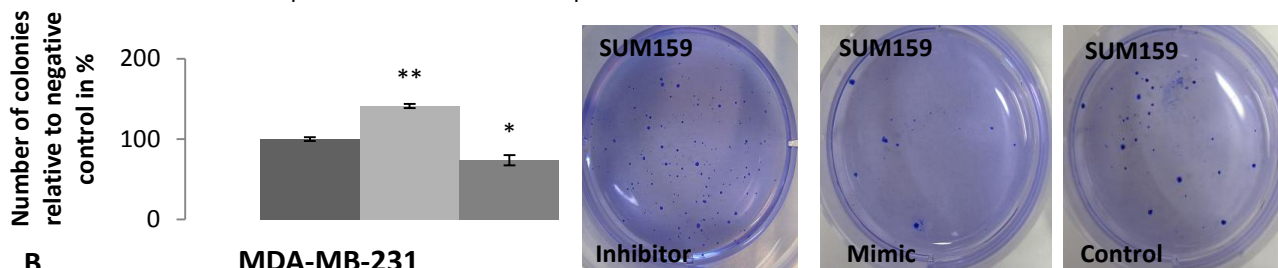**MDA-MB-231**

**B** ■ Control ■ miR-1287-5p inhibitor ■ miR-1287-5p mimic

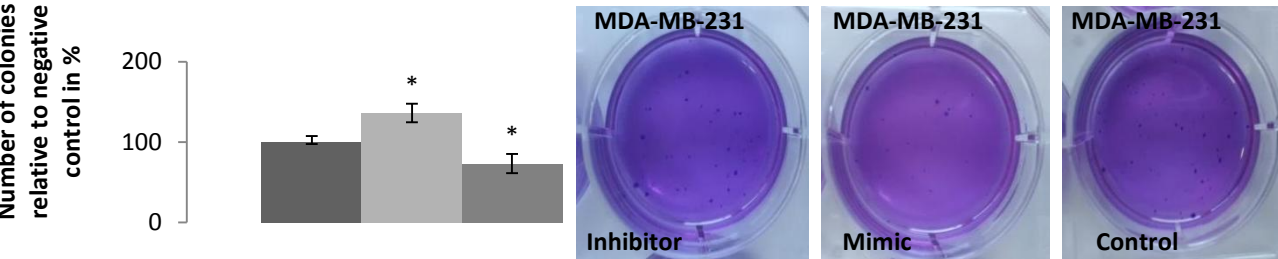**SUM159**

**C** ■ Control ■ miR-1287-5p overexpression

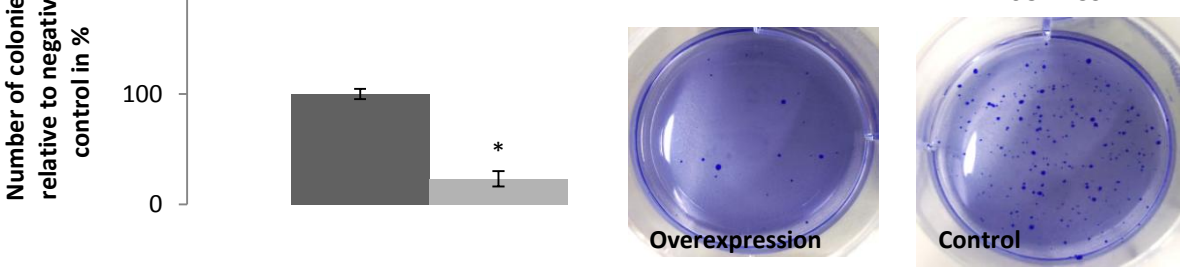**MDA-MB-231**

**D** ■ Control ■ miR-1287-5p overexpression

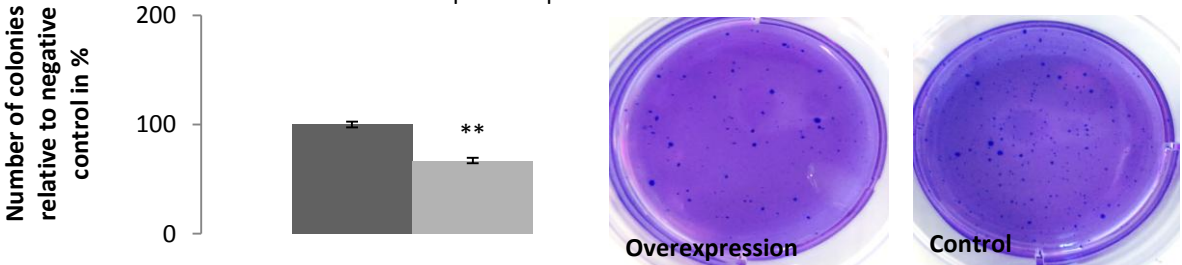**E**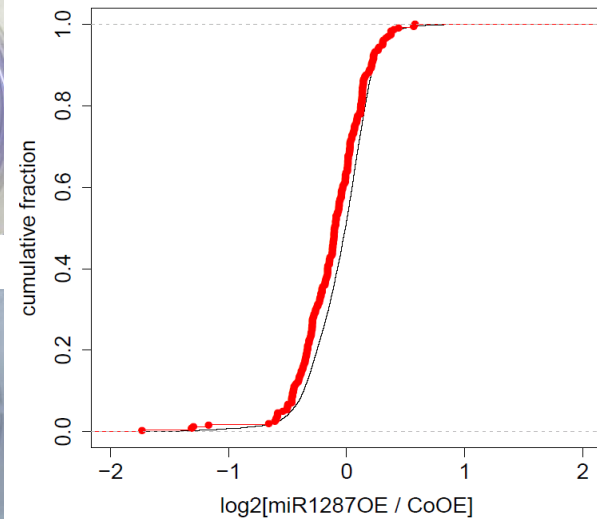**F**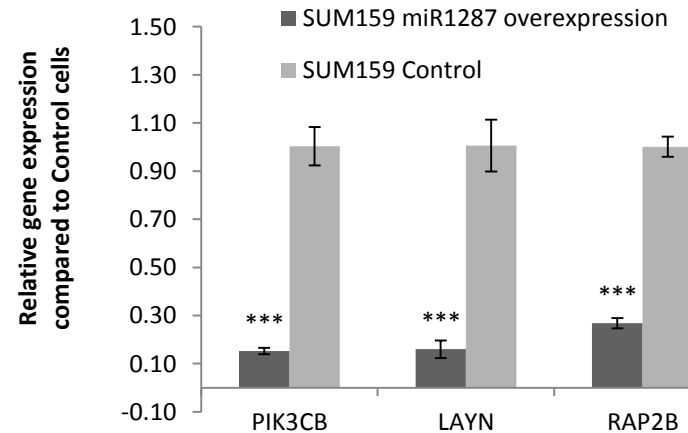

212688\_at

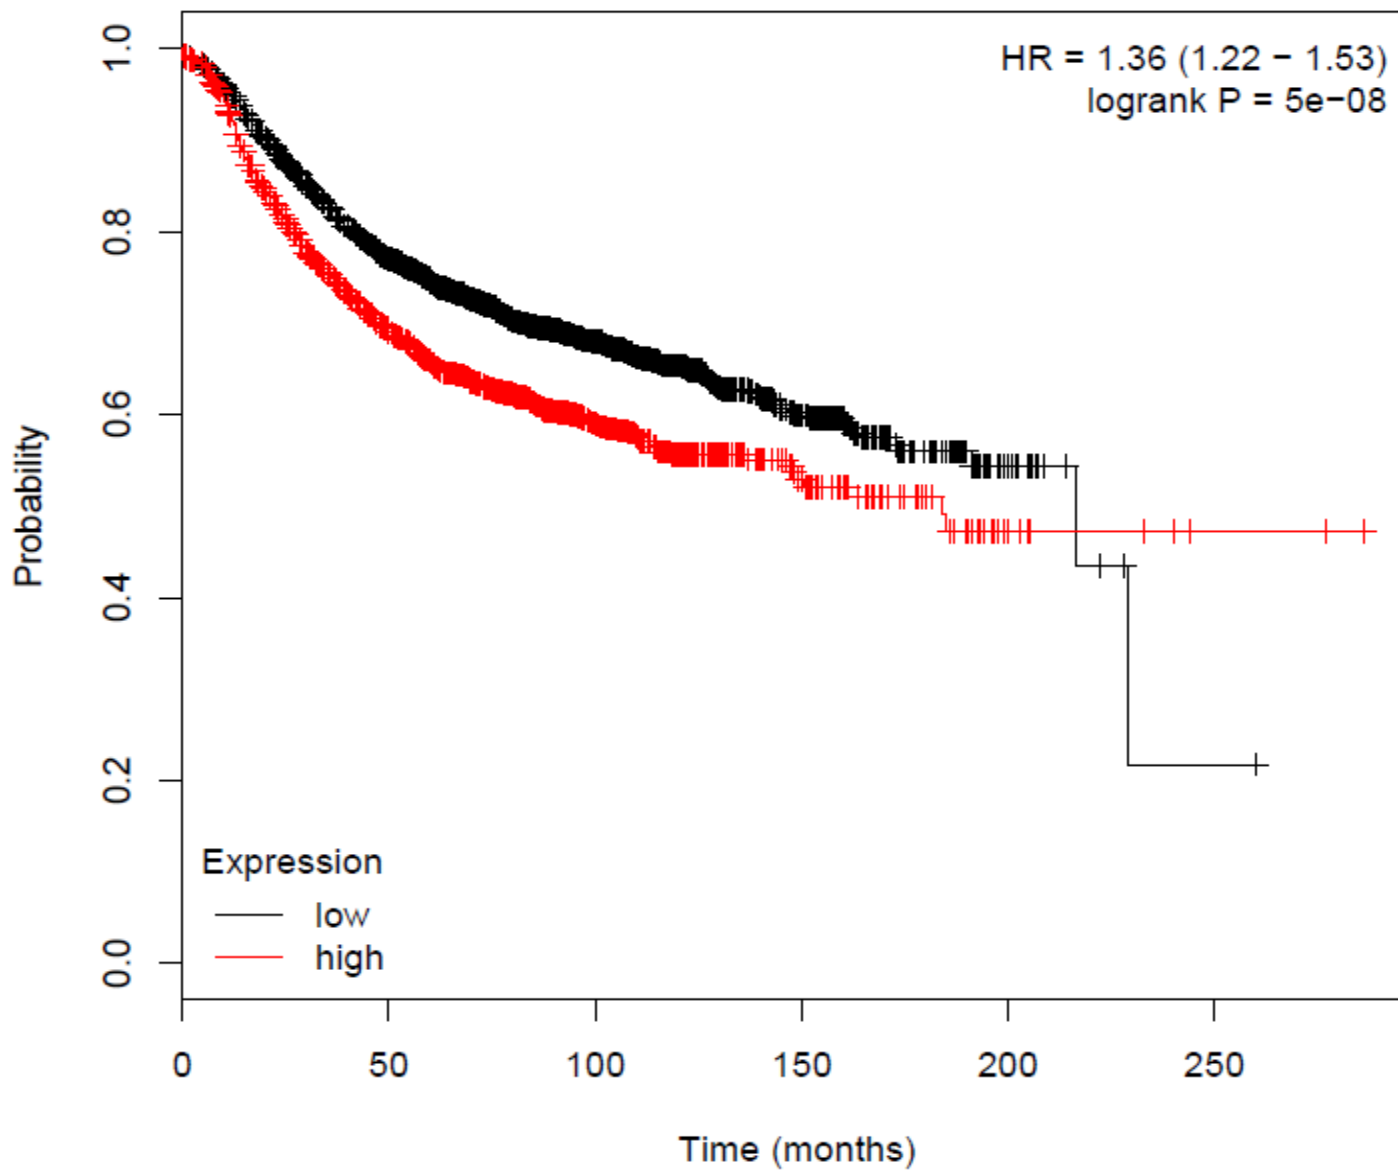

|      | Number at risk |      |     |     |     |     |
|------|----------------|------|-----|-----|-----|-----|
|      | 0              | 50   | 100 | 150 | 200 | 250 |
| low  | 2639           | 1769 | 775 | 171 | 17  | 1   |
| high | 1312           | 750  | 300 | 70  | 10  | 2   |

212688\_at

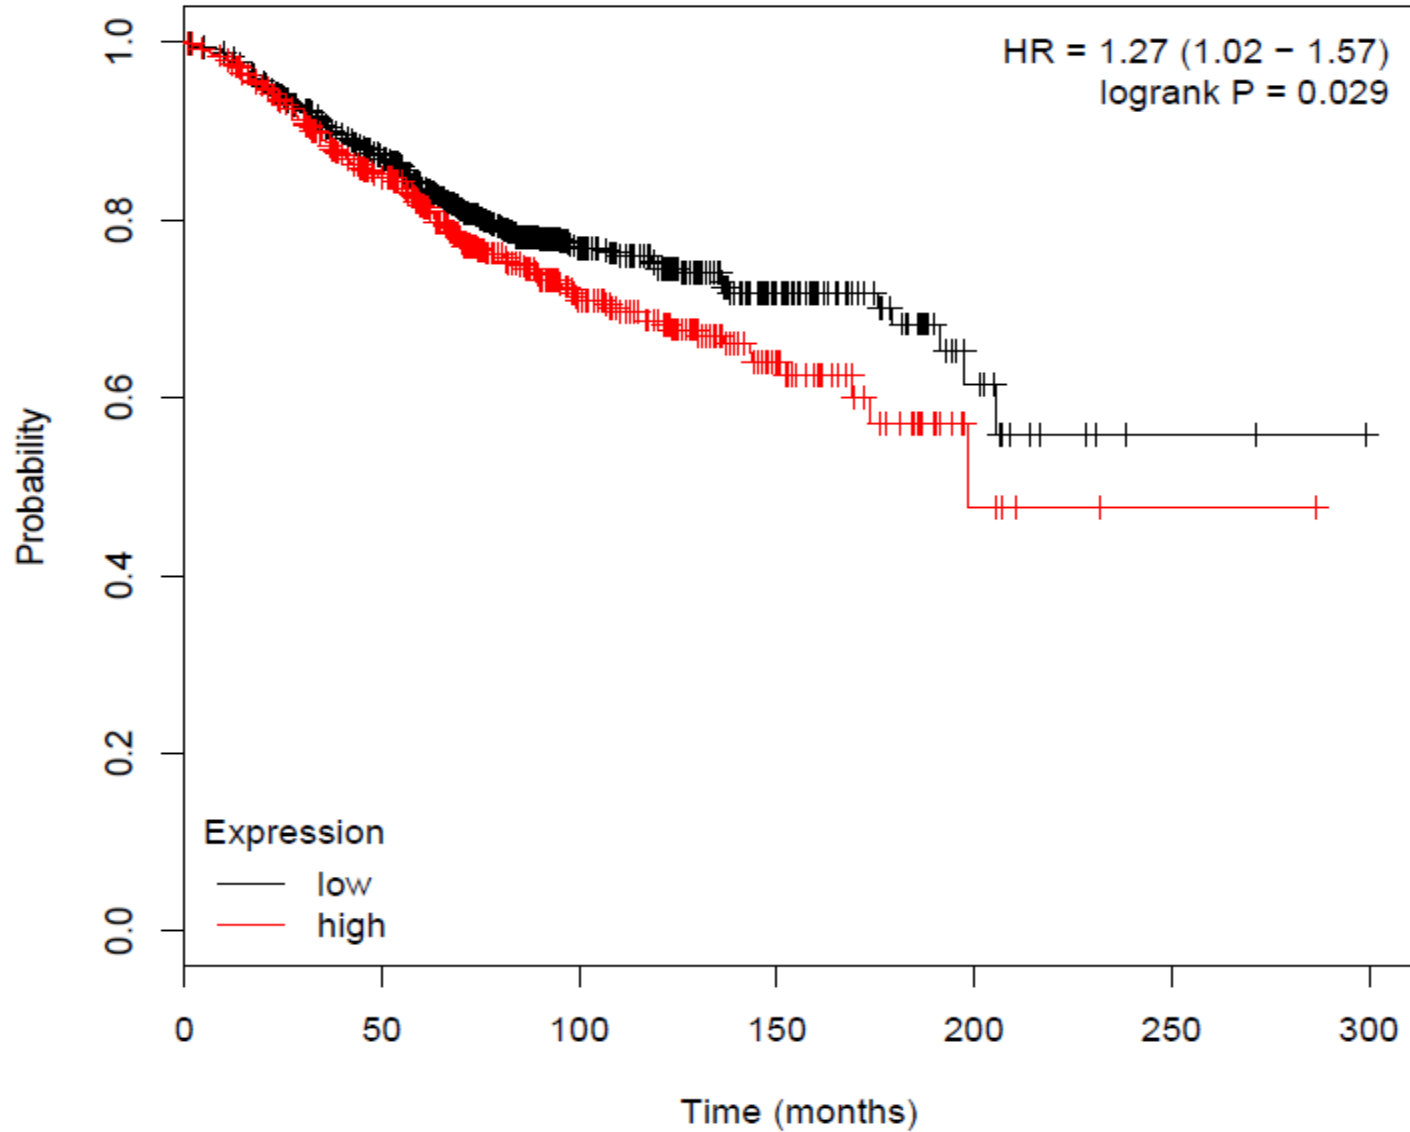

|      | Number at risk |     |     |    |    |   |   |
|------|----------------|-----|-----|----|----|---|---|
| low  | 817            | 650 | 294 | 83 | 16 | 2 | 0 |
| high | 585            | 433 | 183 | 46 | 5  | 1 | 0 |

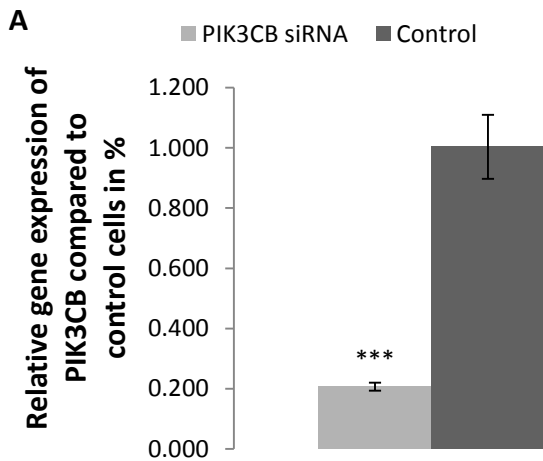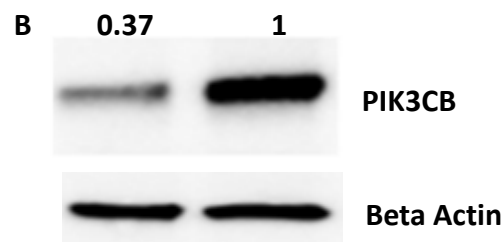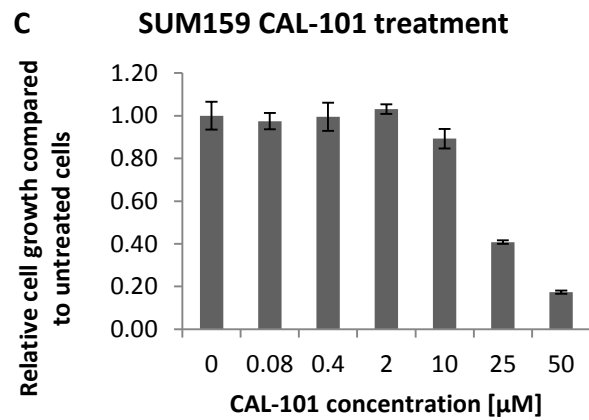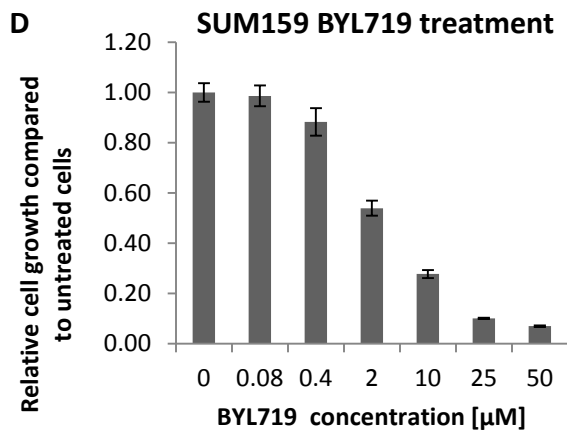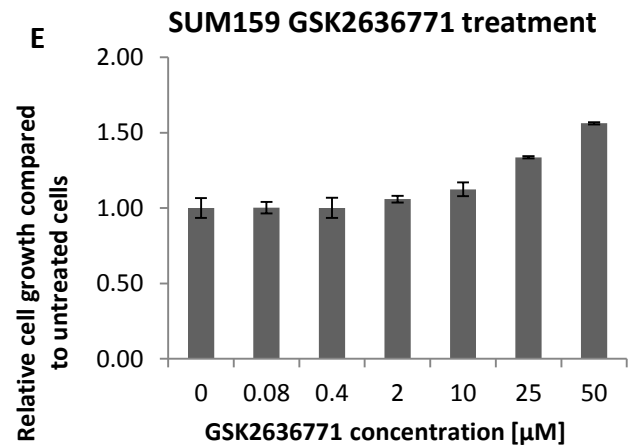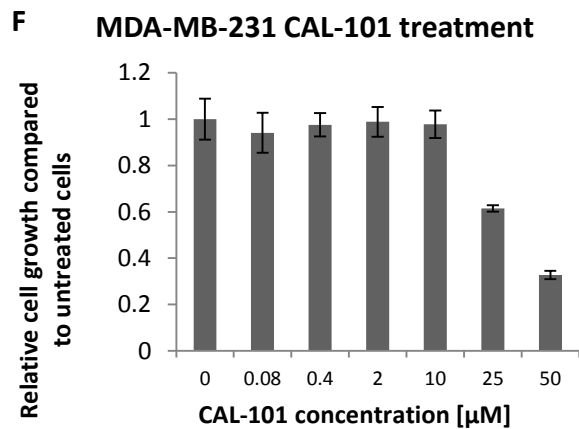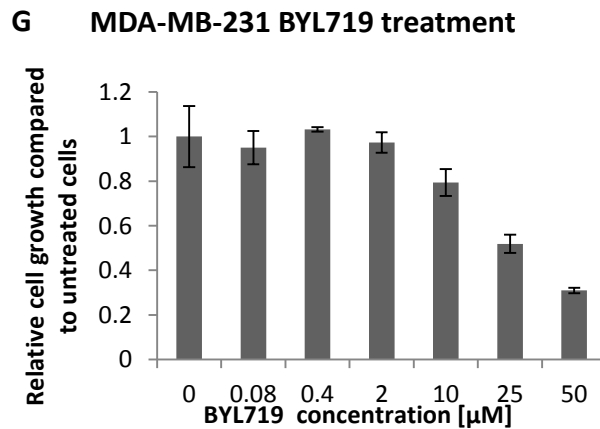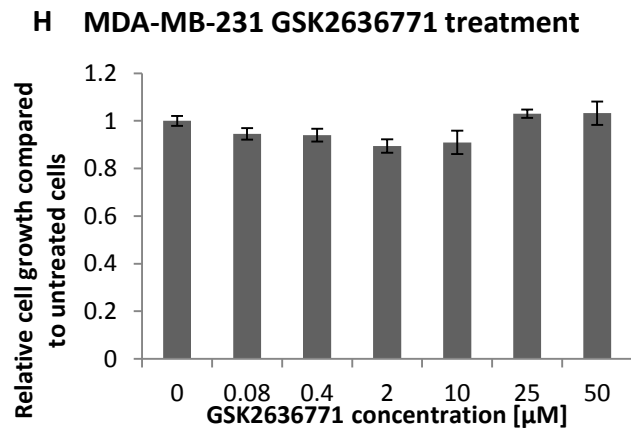

**A**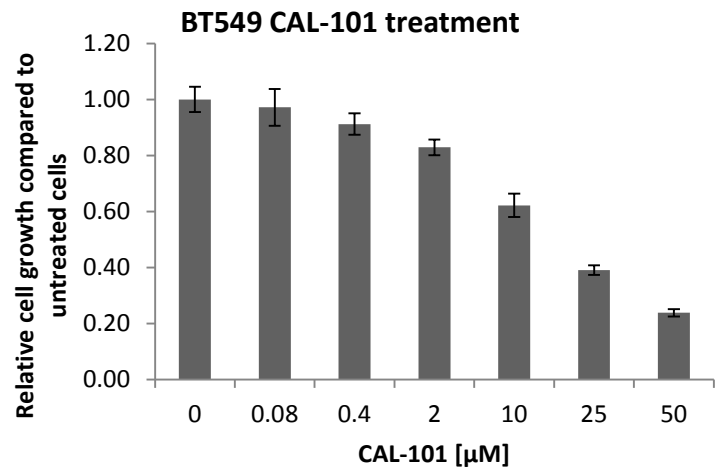**B**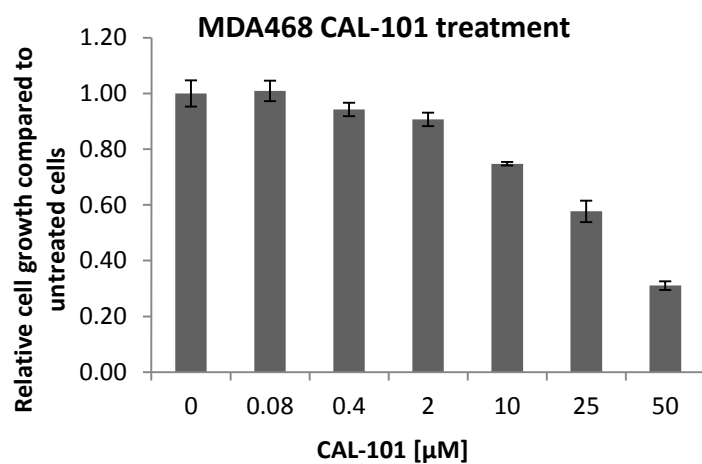**C**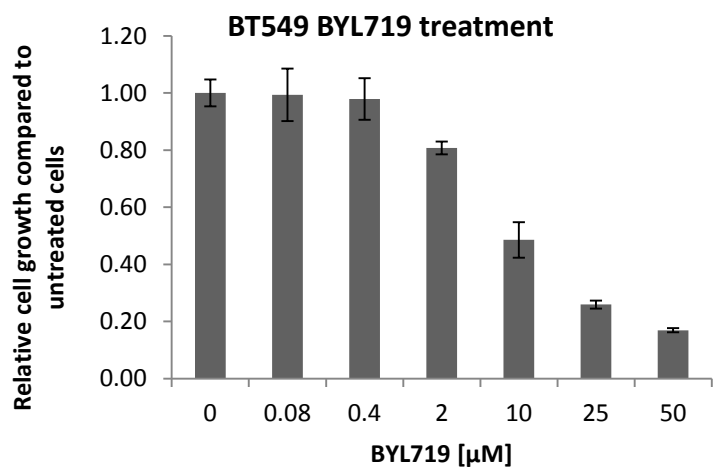**D**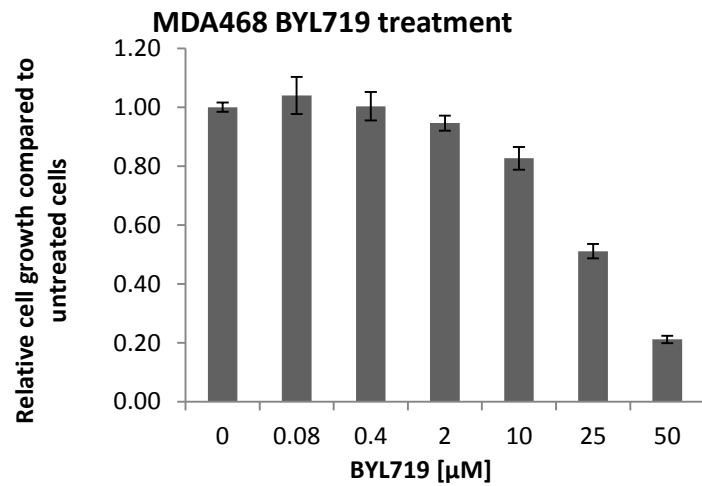

Supplement: 13058_2019_1104_MOESM2_ESM.pdf [file 13058_2019_1104_MOESM2_ESM.pdf]
